# Supplementary material for: A green catalyst and sensor: band engineering of Bi2Fe4O9-based S-scheme p–n/n homo-heterojunction for detection and degradation of cytotoxic drug
Source: Royal Society of Chemistry journal article supplement (doi:10.1039/d3tc02021e), 2023-01-01
Supplement: d3tc02021e1.pdf [file d3tc02021e1.pdf]

**Supporting Information**

**A green catalyst and sensor: Band engineering of Bi<sub>2</sub>Fe<sub>4</sub>O<sub>9</sub> based S-scheme p-n/n homo-heterojunction for detection and degradation of cytotoxic drug**

**Deepeka<sup>a</sup>, Jyoti<sup>a</sup>, Paramdeep kaur<sup>a</sup>, Komal<sup>a</sup>, Sandeep Bansal<sup>b</sup>, Vinod Kumar<sup>c</sup>, Kulbhushan Tikoo<sup>c</sup> and Sonal Singhal<sup>a\*</sup>**

<sup>a</sup>Department of Chemistry, Panjab University, Chandigarh, 160014, India.

<sup>b</sup>Department of Science and Technology, New Delhi, India.

<sup>c</sup>HR-TEM Facility Lab Department of Pharmacology and Toxicology, National Institute of Pharmaceutical Education and Research (NIPER), SAS Nagar-160062, Punjab, India.

\*sonal1174@gmail.com ; sonal@pu.ac.in

**CORRESPONDING AUTHOR:**

Sonal Singhal

Professor,

Department of Chemistry,

Chandigarh

Ph. No. +91-172-2534421(o)

+91-09872118810(m)

**E-mail:** sonal1174@gmail.com

## Table of content

- Synthesis method
- Catalytic Procedure
- Phytotoxicity assessment procedure
- Fabrication of electrode
- Characterization techniques
- Fourier Transform Infrared (FT-IR)
- Raman Spectroscopy
- Optical Studies (Diffuse Reflectance and Photoluminescence Spectroscopy)
- Brunauer-Emmett-Teller (BET) Surface Area Studies
- Thermogravimetric Analysis (TGA)
- Optimization of reaction constraints
- Electrochemical Optimization Parameters
  - *Effect of pH*
  - *Effect of accumulation potential and accumulation time*
- Interference, Repeatability and Reproducibility studies
- Literature Comparison

## List of Figures

- Fig. S1** (a) FT-IR spectra of RTS, BF and synthesized p-n/n homo-heterojunction and PXRD spectra of hydrothermally treated TS powder.
- Fig. S2** FE-SEM micrographs of (a) treated TS powder and (b) treated AFTS powder, EDX spectra of (c) BF, (d) BF 50TS and (e) BF 50AFTS.
- Fig. S3** (a, b and c) high resolution TEM images and (d, e and f) SAED patterns of BF, BF 50TS and BF 50AFTS, respectively.
- Fig. S4** Raman spectra of BF and p-n/n homo-heterojunction.
- Fig. S5** BET linear plots of (a) BF nanoplates, (b) BF 50TS and (c) BF 50AFTS.
- Fig. S6** (a) PL spectra and (b) thermogravimetric analysis curves (c) Photocurrent response of BF, BF 50TS and BF 50AFTS.

49 **Fig. S7** Deconvoluted XPS spectra of (a) Bi 4f, (b) Fe 2p, (c) O 1s of BF and (d) C 1s (inset  
50 showing the survey scan of AFTS), (e) Ca 2p, (f) O 1s and (g) N 1s of AFTS.

51 **Fig. S8** Control experiments (a) for the degradation of LF using BF AF50TS as catalyst at pH  
52 2.5, (b) degradation of pollutants at neutral pH using BF AF50TS in presence of light (without  
53 oxidant).

54 **Fig. S9** Time dependent % removal plots showing the photocatalytic degradation of (a) DR  
55 and (b) LF using BF and p-n/n homo-heterojunction.

56 **Fig. S10** Pseudo first order kinetic curves for the photocatalytic degradation of DR and LF  
57 using BF and p-n/n homo-heterojunctions.

58 **Fig. S11** Pseudo first order kinetic curves for the catalytic degradation (without light  
59 irradiation) of DR and LF using BF and p-n/n homo-heterojunction.

60 **Fig. S12** (a) Radical scavenging studies of LF using BF AF50TS as catalyst, (b) % Removal  
61 plots revealing the optimized catalyst loading.

62 **Fig. S13** GC-MS fragment analysis chart for DR intermediates in presence of light only.

63 **Fig. S14** GC-MS fragment analysis chart for DR intermediates in presence of oxidant, BF  
64 50AFTS and light.

65 **Fig. 15** (a) Interference of possible anions on %removal of DR (b) leaching of metal ions  
66 during degradation of DR utilizing BF and BF 50AFTS (catalyst amount used 0.60 g/L and pH  
67 = 2.5)

68 **Fig. S16** (a) % Removal of TOC using BF and BF 50AFTS, (b) Time-dependent UV-visible  
69 spectra for degradation of mixture of SO, RB-Y, DR and LF using BF 50AFTS p-n/n homo-  
70 heterojunction, (c) Recyclability studies of BF 50AFTS.

71 **Fig. S17** (a, b) FE-SEM image at 1 mm and 400 nm, and (c) TEM image at 100 nm of recovered  
72 BF 50AFTS.

73 **Fig. S18** SWASV response of BF 50AFTS@GCE for DR (a) at different pH in acetate buffer  
74 (b) with varying accumulation potential (c) for different accumulation times.

75 **Fig. S19** Interference studies for various drugs (levofloxacin (LF), ofloxacin (OF),  
76 ciprofloxacin (CF), tetracycline (TC), diclofenac (DF), paracetamol (PCM)), ascorbic acid  
77 (AA), uric acid (UA), glucose (GL), dopamine (DA) and nitro phenols (2-aminophenol (2AP))

78 and 4-aminophenol (2AP)) on detection of 17.27  $\mu\text{M}$  of DR in 0.1 M acetate buffer ( $\text{pH} = 5.0$ )  
79

80 **Fig. S20** (a) Current response obtained for 17.27  $\mu\text{M}$  DR drug obtained from repeatability  
81 analysis of BF 50AFTS@GCE and (b) Reproducibility analysis of BF 50AFTS@GCE with  
82 17.27  $\mu\text{M}$  DR under optimized parameters.

83

84

#### List of tables

85 **Table S1** Values of crystallite size (D), lattice parameters (a, b, c) and band gap ( $E_g$ ) for  
86 synthesized BF and p-n/n homo-heterojunction.

87 **Table S2** Elemental composition of BF, BF 50TS and BF 50AFTS.

88 **Table S3** Percentage degradation, completion time and their corresponding rate constant values  
89 for the degradation of DR and LF drugs using BF and its p-n/n homo-heterojunction (with light  
90 (L) and without light (W.L)).

91 **Table S4.** Comparison of specific photocatalytic efficiency of BF and modified BF for  
92 degradation of DR and LF.

93 **Table. S5** Possible intermediates of DR during degradation in presence of light only

94 **Table. S6** Possible intermediates of DR during photocatalytic degradation

95 **Table S6** Toxicity assessment (using ECOSAR) of intermediates recorded during degradation  
96 of DR under different conditions.

97 **Table S8** MRI, GP% and calculated SVI values of *Vigna radiata* seed germination in  
98 contaminated river water (before and after phototreatment)

99 **Table S9** Comparison of present work with recently published  $\text{Bi}_2\text{Fe}_4\text{O}_9$  based literature  
100 reports.

101

## 102 **Synthesis method**

103 BF (x wt%)TS (x= 0, 25, 50, 75) p-n/n homo-heterojunction were synthesised via well-  
104 known hydrothermal route. Equimolar amounts of  $\text{Bi}(\text{NO}_3)_3 \cdot 5\text{H}_2\text{O}$  and  $\text{FeCl}_3 \cdot 6\text{H}_2\text{O}$  were  
105 dissolved in 500 mL distilled water containing 100 mL acetone. pH of the solution was adjusted  
106 in the range of 10-11 by adding ammonia solution, thick brown precipitates were obtained.  
107 Precipitates were washed with distilled water several times till neutral pH was attained. The  
108 precipitates were separated out via centrifugation and dispersed in aqueous sodium hydroxide  
109 solution followed by addition of varying amount of TS powder (before use TS were washed,  
110 grounded and sieved). The obtained mixture was then transferred to Teflon autoclave and kept  
111 in a preheated hot air oven at constant temperature of 140 °C for 72 h. Final product was washed  
112 with distilled water and ethanol followed by drying at 70 °C for 16 h [17]. Pristine BF  
113 nanoplates were also synthesised using the above mentioned method, without addition of TS  
114 powder.

115 Further, amination reaction was performed to modify TS powder with amine  
116 functionalities [2]. For this, 2 g of TS powder was dispersed in 400 mL of 1 M NaOH under  
117 ultrasonication followed by magnetic stirring. 18 mmol epichlorohydrin was added to the  
118 mixture and allowed to react for 2 h at 60 °C. In order to attain pH below 12, the mixture was  
119 washed repeatedly with deionized water. Treated powder was recovered via centrifugation and  
120 further treated with sodium hydroxide (400 mL, 0.1 M) and ammonia solution (15 mL, 29.4%  
121 w/v) for another 2 h at 60 °C. Final product was washed several times with water till neutral  
122 was attained and dried at 45 °C in hot air oven. The aminated TS powder was then utilized for  
123 synthesis of BF 50AFTS as mentioned above.

## 124 **Catalytic Procedure**

125 100 mL model pollutant solution of DR and LF (50 mg/L) was introduced with 60 mg  
126 synthesized catalyst and dispersed under ultrasonication for 5 min. Obtained solution was kept  
127 in dark under magnetic stirring for 30 min to attain the needful adsorption-desorption  
128 equilibrium (100-120 rpm). 100 mL of  $\text{H}_2\text{O}_2$  (8.8 mM, 30% w/v) was added to the solution  
129 followed by stirring (100-120 rpm) under visible light irradiation (400 W Hg lamp operating  
130 at 220 V as visible light source with light intensity near the surface of solution to be  
131 51.2 mW/cm<sup>2</sup>). Small sample aliquots were withdrawn at fixed time intervals and catalyst was

132 separated via centrifugation, obtained supernatant was then analyzed with UV-vis  
133 spectrophotometer.<sup>3</sup>

#### 134 **Phytotoxicity assessment procedure**

135 After sanitization, selected healthy and uniform sized mung seeds (*Vigna radiata*) were  
136 swamped (for 3 h) in the river water containing 0.5 mg/mL BF 50AFTS. After 3 h seeds were  
137 stained out and kept undisturbed for 5 days under moist conditions. Similar experiments were  
138 performed for blank river water and river water containing contamination (DR and LF before  
139 phototreatment and after phototreatment). In order to maintain the integrity all experiments  
140 were performed thrice and after 5 days mean root elongation (MRE in cm) of seedlings was  
141 measured. Further, GP (germination %,) using equation S1 and SVI (seedling vigour index)  
142 using equation S2 were also calculated to measure the Phytotoxicity.<sup>4</sup>

$$143 \quad GP = \frac{\text{Germinated seeds}}{\text{Total number of seeds}} * 100 \quad (S1)$$

$$144 \quad SVI = GP * \text{Average length of seedling} \quad (S2)$$

#### 145 **Fabrication of electrode**

146 The Glassy carbon electrode (GCE) was cleaned properly using alpha-alumina Powder  
147 slurry (0.5  $\mu\text{m}$ ). GCE was then sonicated (for 60 second in ethanol and water) and dried at  
148 room temperature. A uniform dispersion of catalyst (5 mg/mL) was prepared in aqueous  
149 medium, 4  $\mu\text{L}$  suspension was robbed to drop casted on prewashed GCE and allowed to dry  
150 naturally. To study sensing ability of modified electrode towards DR drug cyclic voltammetric  
151 and square wave anodic stripping voltammetric studies were performed in acetate buffer  
152 (supporting electrolyte) having pH 5.

#### 153 **Characterization techniques**

154 The instrumental details for characterization studies performed in the current work are:  
155 Structural features and presence of functional groups were assessed utilizing Fourier Transform  
156 Infrared spectra in the range of 450 to 4000  $\text{cm}^{-1}$  (Nicolet iS50 FT-IR) , Phase purity and  
157 crystal structure were examined using X-ray diffractometer (Panalytical's X'Pert Pro  
158 diffractometer) with  $\text{CuK}\alpha$  radiation ( $\lambda = 1.5406 \text{ \AA}$ ). Field Emission Scanning Electron  
159 Microscopy (FE-SEM, Hitachi- SU8010) and High Resolution- Transmission Electron  
160 Microscope (HR-TEM, FEI Tecnai (G2 F20) operating at 200 keV) were utilized to ascertain  
161 morphological and elemental composition studies. Elemental oxidation states were examined

162 using X-ray Photoelectron Spectroscopy (XPS) Nexsa Base, (Thermofisher Scientific),  
 163 JASCO, V- 750; UV–Vis Spectrophotometer was employed to investigate optical and  
 164 degradation studies. Thermo Scientific TSQ 8000 GC-MS (instrument method - Solvent  
 165 Delay\_4.5m) was utilized to ascertain intermediates and by-products generated during  
 166 degradation. Photoluminescence studies were performed using Hitachi Fluorescence  
 167 Spectrophotometer (F- 7000), Photo-irradiation was braced by 400 W Hg lamp operating at  
 168 220 V, BrunauereEmmetteTeller (BET, Belsorp max) was employed for surface area studies  
 169 and Raman analysis was performed using HORIBA JAPAN Xplor PLUS instrument. STD  
 170 Q600 TA instrument was utilized to testify thermal stability of synthesised materials. iCAP-  
 171 RQ ICP-MS (Inductive Coupled Plasma Mass Spectroscopy) was employed for quantification  
 172 of metal ion leaching. Electrochemical studies were performed using Metrohm  
 173 Autolab/PGSTAT204 electrochemical work station. Atomic force microscopy using AFM  
 174 **Fourier Transform Infrared (FT-IR)**

175 The detailed information regarding structural changes and presence of functional  
 176 groups on RTS (raw tamarind shell), BF (x)TS (x= 25, 50, 75 wt%) and BF 50AFTS was  
 177 congregated via FT-IR spectroscopy (Fig. S1 (a)). In case of  $\text{Bi}_2\text{Fe}_4\text{O}_9$ , four iron atoms have  
 178 two different sites,  $\text{Fe}_{(a)}$  occupies a tetrahedral site, while  $\text{Fe}_{(b)}$  having octahedral site. The  
 179 bands at  $\sim 442$  and  $491\text{ cm}^{-1}$  could be attributed to stretching and bending vibrations of Fe-O  
 180 in octahedral coordination of BF. Whereas, the band arising at  $\sim 807$  and  $628\text{ cm}^{-1}$  may be due  
 181 to tetrahedral stretching vibrations of Fe-O in tetrahedral coordination.<sup>5</sup> In case of RTS,  
 182 presence of hydroxyl ( $\sim 3400\text{ cm}^{-1}$ ), carboxyl ( $1730\text{ cm}^{-1}$ ), amine ( $1520\text{ cm}^{-1}$ ) and ester ( $1740$   
 183  $\text{cm}^{-1}$ ) groups were observed by FT-IR spectra (Fig. S1 (a)), bands roused at  $\sim 1048$  and  $1630$   
 184  $\text{cm}^{-1}$  indicated the presence of stretching vibrations of C-O and  $\text{CH}_2=\text{CH}_2$ , respectively. The  
 185 weak bands present at  $\sim 2920$  and  $2850\text{ cm}^{-1}$  were assigned to stretching vibrations of  $-\text{CH}_2-$   
 186 and  $-\text{CH}-$  bonds of methylene groups, respectively. The band with decent intensity at  $\sim 1440$   
 187  $\text{cm}^{-1}$  confirmed the presence of C=C stretch of aromatic rings; but in case of FT-IR spectra of  
 188 BF (x)TS p-n/n homo-heterojunction, the band at  $\sim 1440$  (corresponding to C=C stretch) and  
 189 two other bands at  $\sim 1520$  and  $1740\text{ cm}^{-1}$  (corresponding to amine and ester groups) get  
 190 vanished indicating the removal of some C=C stretching vibrations, amine and ester groups,  
 191 respectively. Reduction of TS powder in presence of NaOH and high temperature during  
 192 synthesis could be the possible reason for this observation. This reduction produced additional  
 193 binding sites and free electrons, beneficial for catalytic reactions.<sup>6</sup> In case of BF 50AFTS,  
 194 extensive broadening in FTIR band at  $\sim 3440\text{ cm}^{-1}$  along with shoulder (overtone of N-H

195 bending vibrations) at  $\sim 3250\text{ cm}^{-1}$  confirmed the presence of N-H stretching of amine group.  
 196 Weak bands around  $\sim 1500$  and  $710\text{ cm}^{-1}$  indicates the presence of C-N bending and N-H  
 197 wagging vibrations of amine, respectively, confirming the presence of amine functionalize TS  
 198 in the p-n/n homo-heterojunction.<sup>7</sup> Thus, it can be concluded that the natural amine groups of  
 199 TS could not survive under current reaction conditions. But amine group provided by amination  
 200 reaction lasted long even at high temperature conditions.

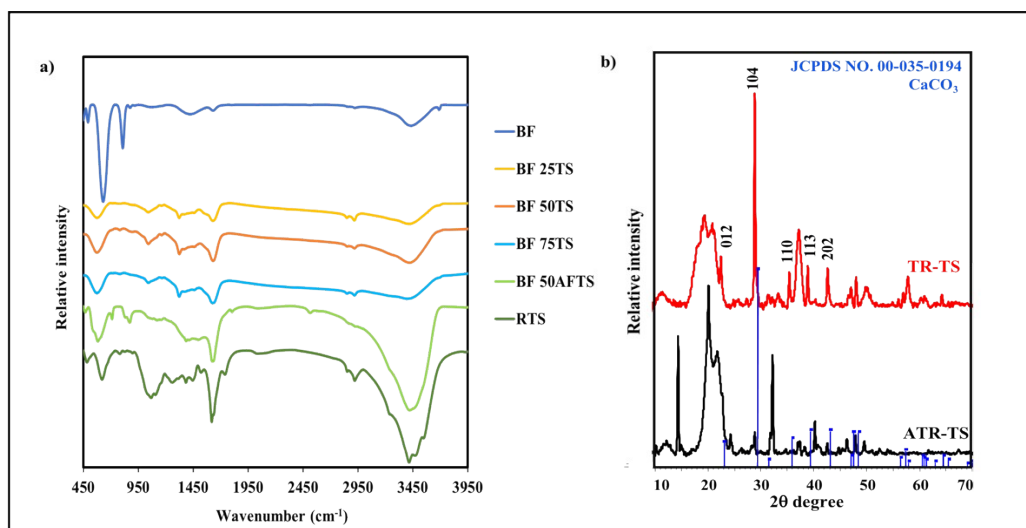

203 **Fig. S1 (a)** FT-IR spectra of RTS, BF and synthesized p-n/n homo-heterojunction and (b)  
 204 PXRD spectra of hydrothermally treated TS powder.



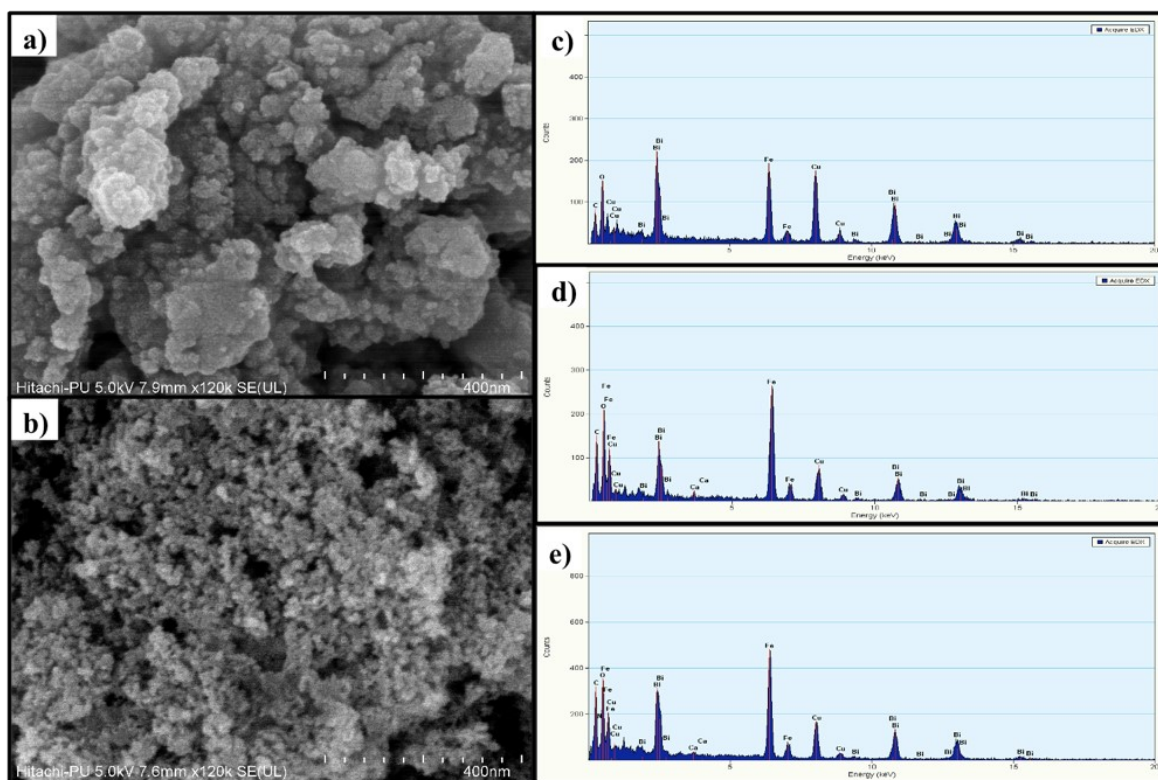

205

206 **Fig. S2** FE-SEM micrographs of (a) treated TS powder and (b) treated AFTS powder, EDX  
 207 spectra of (c) BF, (d) BF 50TS and (e) BF 50AFTS.

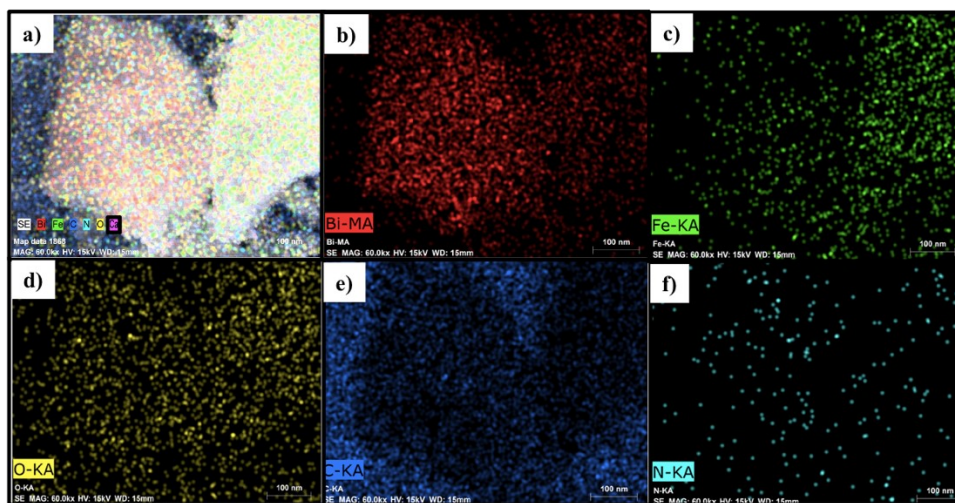

208

209 **Fig. S3.** Mapping image of BF 50AFTS.

## 210 Raman Spectroscopy

211 Raman spectra of BF and composites (BF 50TS and BF 50AFTS) were recorded using  
 212 200  $\mu\text{m}$  slit and presented in Fig. S4.

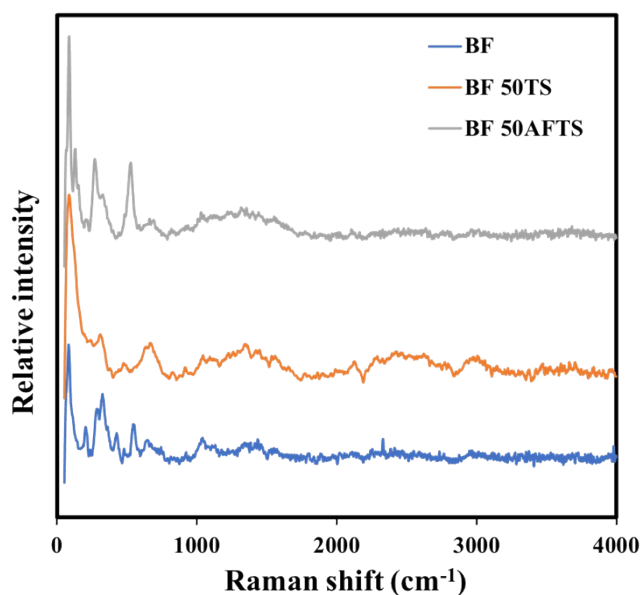

**Fig. S4** Raman spectra of BF and p-n/n homo-heterojunction.

The orthorhombic bismuth ferrite possess 42 active modes of Raman ( $12A_g + 12B_{1g} + 9B_{2g} + 9B_{3g}$ ) out of which 10 modes were observed here at 80, 126, 210, 305, 340, 400, 470, 540, 625, 698  $\text{cm}^{-1}$ .<sup>8</sup> The Raman modes below 170  $\text{cm}^{-1}$  could be attributed to  $A_g$  mode of Bi atoms that vibrates along the x-y plane. The Raman modes existing in the range of 150-250  $\text{cm}^{-1}$  represent  $A_g$  mode generated from vibrations of Fe atoms along the X-Y plane. Furthermore, the Raman modes above 250  $\text{cm}^{-1}$  aroused due to stretching motion of oxygen.<sup>9</sup> Presence of broad hump in the range of 900 - 1700  $\text{cm}^{-1}$  corresponding to G and D bands certified the presence of carbonaceous material in case of BF 50TS and BF 50AFTS, thereby confirming the successful fabrication of p-n/n homo-heterojunctions.

**Table. S1** Values of crystallite size (D), lattice parameters (a, b, c) and band gap ( $E_g$ ) for synthesized BF and p-n/n homo-heterojunction.

| Catalyst | a (Å) | b (Å) | c (Å) | Crystallite size (nm) | Band gap (eV) |
|----------|-------|-------|-------|-----------------------|---------------|
| BF       | 7.962 | 8.471 | 6.014 | 42.9                  | 2.19          |
| BF 25TS  | 8.044 | 8.803 | 6.102 | 41.1                  | 2.05          |
| BF 50TS  | 7.872 | 8.364 | 5.983 | 39.9                  | 1.93          |
| BF 75TS  | 7.861 | 8.353 | 5.954 | 35.2                  | 2.01          |

|           |       |       |       |      |      |
|-----------|-------|-------|-------|------|------|
| BF 50AFTS | 7.874 | 8.352 | 5.972 | 39.7 | 1.91 |
| AFTS      | -     | -     | -     | -    | 2.04 |

227

228 **Table S2** Elemental composition of BF, BF 50TS and BF 50AFTS.

| Elements     | Weight% | Atomic% | Weight%  | Atomic%  | Weight%   | Atomic%  |
|--------------|---------|---------|----------|----------|-----------|----------|
|              | BF      | BF      | BF 50FTS | BF 50FTS | BF 50AFTS | BF 50FTS |
| <b>C(K)</b>  | -       | -       | 17.70    | 48.56    | 18.57     | 51.40    |
| <b>O(K)</b>  | 11.98   | 50.55   | 13.26    | 27.30    | 11.44     | 23.77    |
| <b>Ca(K)</b> | -       | -       | 1.10     | 0.05     | 0.25      | 0.21     |
| <b>Fe(K)</b> | 23.73   | 28.68   | 28.93    | 17.06    | 25.40     | 15.11    |
| <b>Bi(L)</b> | 64.27   | 20.75   | 38.98    | 6.14     | 43.22     | 6.87     |
| <b>N(K)</b>  | -       | -       | -        | -        | 1.09      | 2.60     |

229

### 230 Brunauer-Emmett-Teller (BET) Surface Area Studies

231 Catalytic ability of a material highly depends on its surface area, in this concern N<sub>2</sub>  
232 adsorption/desorption (Brunauer-Emmett-Teller) analysis was accomplished to appraise the  
233 specific surface area and porous characteristics of the synthesized nanomaterials. Prior to  
234 adsorption of N<sub>2</sub> on surface of nanomaterials, degassing process was carried out at 100 °C for  
235 1h. After analyzing the relative pressure of gas, amount of gas adsorbed was examined and  
236 values of specific surface area were calculated using BET adsorption equation. The typical  
237 linear plots of  $1/[Q\{(P_0/P)-1\}]$  vs. relative pressure for BF, BF 50TS and BF 50AFTS are  
238 depicted in Fig. S5. The results analysed from graph were interpreted utilizing the  
239 mathematical formula presented by earlier literature reports.<sup>10, 11</sup> The specific surface area  
240 value for BF was found to be 4.32 m<sup>2</sup>/g, while dramatical enhancement in surface area was  
241 observed with introduction of 50% TSP and much larger values of surface area 43.4 m<sup>2</sup>/g was  
242 obtained for BF 50TS i.e., 10 fold enhancement was observed with introduction of 50 wt% TS.  
243 The significantly large value of surface area of BF 50TS as that of BF could be attributed to  
244 highly porous and extremely small particles of TS. Furthermore, BF 50AFTS posed

phenomenally high value of surface area ( $99.0 \text{ m}^2/\text{g}$ ), i.e. amination reaction of TS led to approximately two fold enhancement of surface area. The dramatical hike in surface area with implantation of amine functionalities could be the result of decrease in aggregation between AFTS particles (as that of TS) as revealed by FE-SEM studies (Fig. S2 (a, b)).

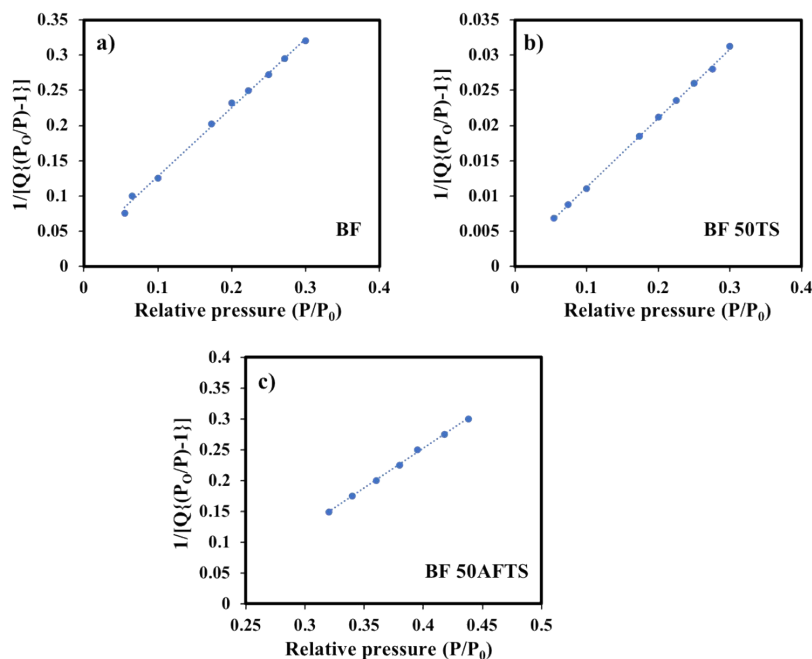

**Fig. S5** BET linear plots of (a) BF nanoplates, (b) BF 50TS and (c) BF 50AFTS.

### Thermogravimetric Analysis (TGA)

Thermal stability of material was testified upto  $1000^\circ\text{C}$  under TGA analysis, BF plates were found to be highly stable upto  $1000^\circ\text{C}$  (Fig. S6 (b)). Only 5.9% weight loss was observed for BF, evaporation of residual water molecules could be the possible reason for the weight loss. While in case of BF 50TS and BF 50AFTS,  $\sim 38\%$  weight loss was observed upto  $1000^\circ\text{C}$ , additional weight loss of 32% in case of p-n/n homo-heterojunction may be due to the decomposition of some carbon content. From TGA curves of both the p-n/n homo-heterojunction, it can be clearly seen that weight loss in BF 50AFTS is more as that of BF 50TS, which may be due to the decomposition of slightly high concentration of water content (i.e. 4% weight loss difference below  $200^\circ\text{C}$ ) and some organic compounds used during amination process. It can be concluded that some part ( $\sim 18\%$ ) of the carbonaceous material (fabricated from TSP) present in p-n/n homo-heterojunction is highly stable.

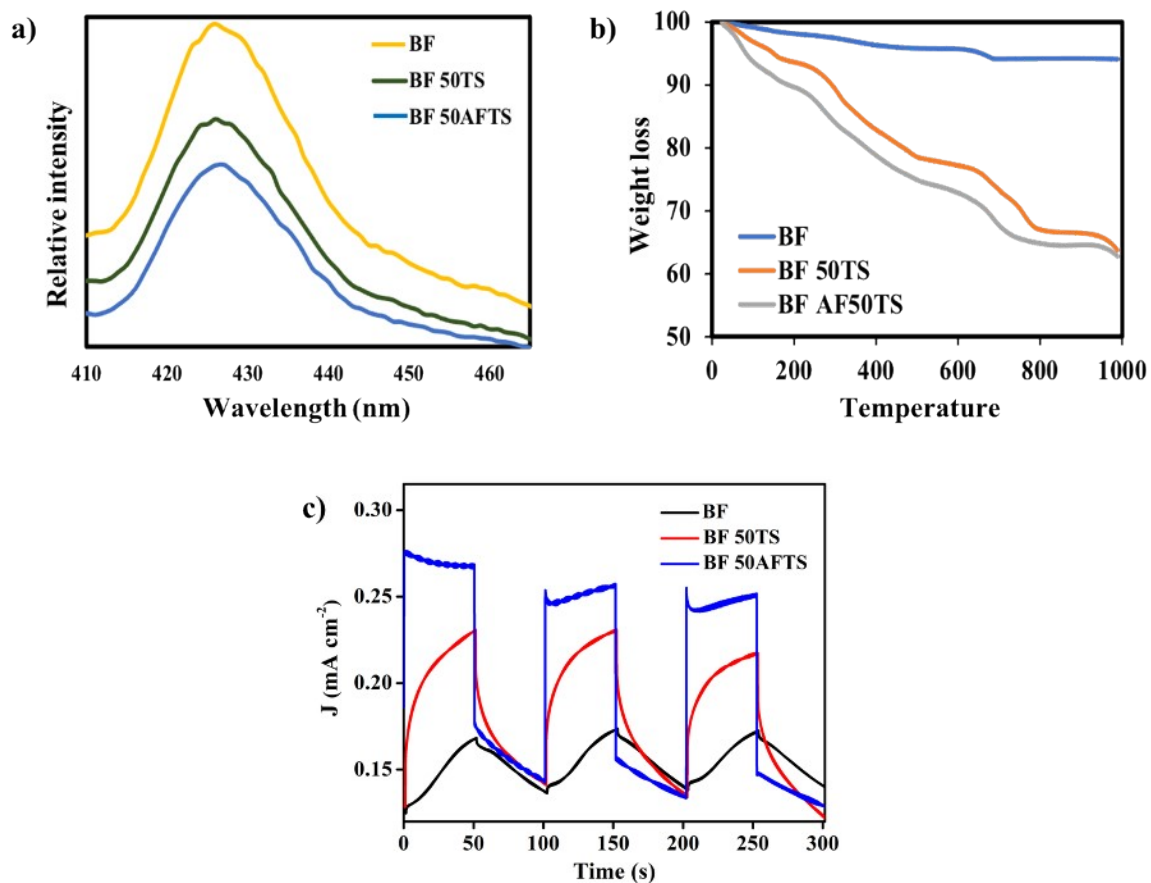

263

264 **Fig. S6** (a) PL spectra and (b) thermogravimetric analysis curves (c) Photocurrent response of  
 265 BF, BF 50TS and BF 50AFTS.

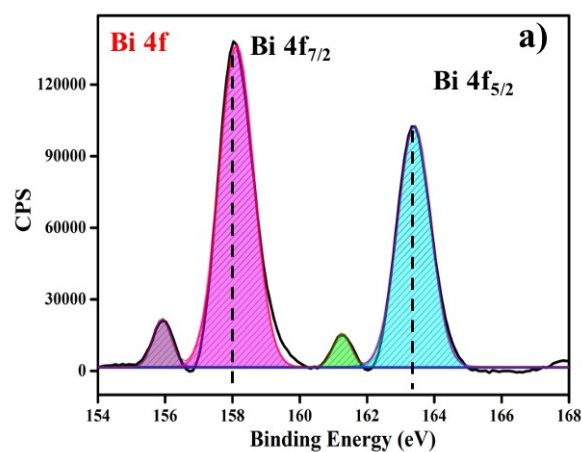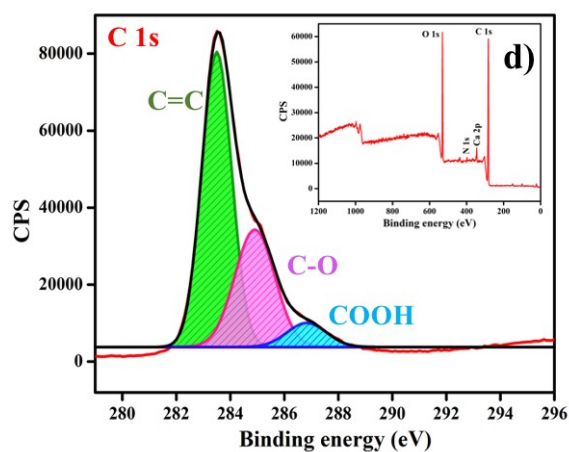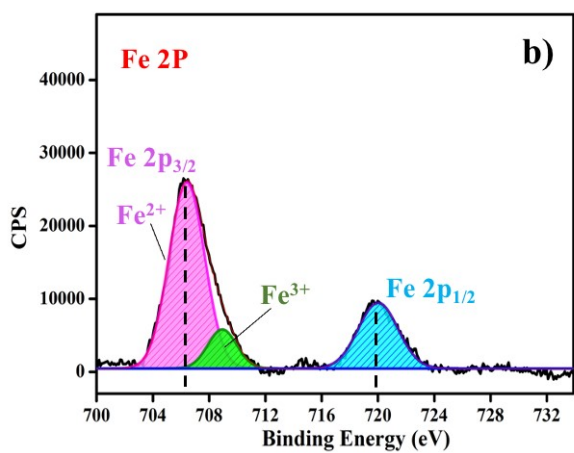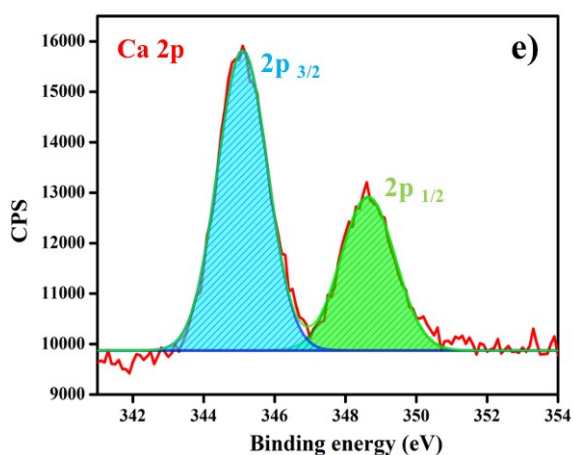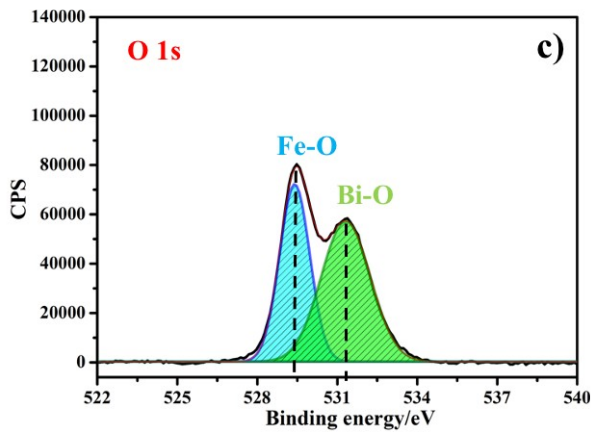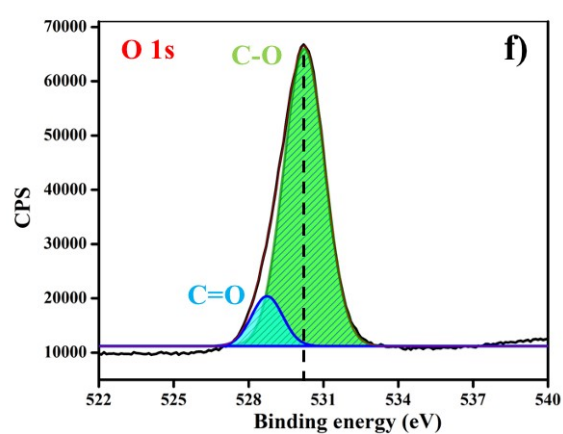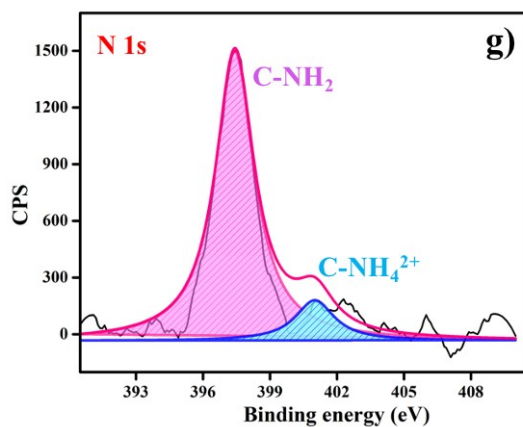



**Fig. S7** Deconvoluted XPS spectra of (a) Bi 4f, (b) Fe 2p, (c) O 1s of BF and (d) C 1s (inset showing the survey scan of AFTS), (e) Ca 2p, (f) O 1s and (g) N 1s of AFTS.

### Optimization of reaction constraints

In order to investigate the necessary conditions for oxidative degradation of model pollutants, control experiments and optimization studies were performed for LF drug utilizing the BF 50TS as catalyst. Various reaction constraints such as oxidant, catalyst and light were examined at pH 2.5 using BF AF50TS as catalyst as shown in Fig. S8 (a). The synthesized catalyst was found to be highly efficient even in the absence of light whereas, best results were obtained when ferrite + catalyst + oxidant + light were present all together. Fig. S8 (b) showcased efficiency of synthesized BF AF50TS for degradation of model pollutants in absence of acid and oxidant (i.e. in presence of catalyst and light only), more than 67% removal was observed for all the model pollutants. 95% removal of DR and 67% removal of LF (in 120 min) even in absence of acid and oxidant showcased appreciable efficacy of synthesized material.

The catalyst Dosage was varied from 0.30 to 1.2 g/L and the rate of reaction was observed to increase with amount of catalyst up to 0.60 g/L and further increase in catalyst dosage exhibited a slight increase in catalytic activity which could be due to saturation of surface active sites hence, 0.60 g/L was considered as the optimal catalytic dosage for further reactions (Fig. S12 (b)).

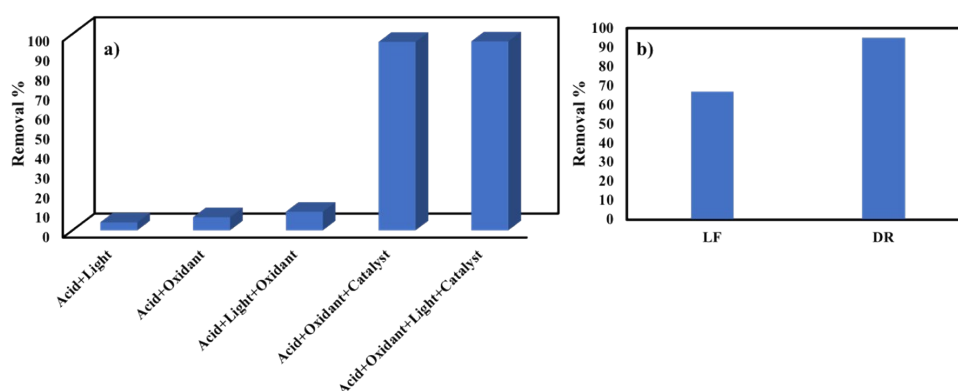

286

**Fig. S8** Control experiments for the degradation of LF (a) under different reaction conditions using BF AF50TS as catalyst at pH 2.5, (b) at neutral pH using BF AF50TS in presence of light (without oxidant).

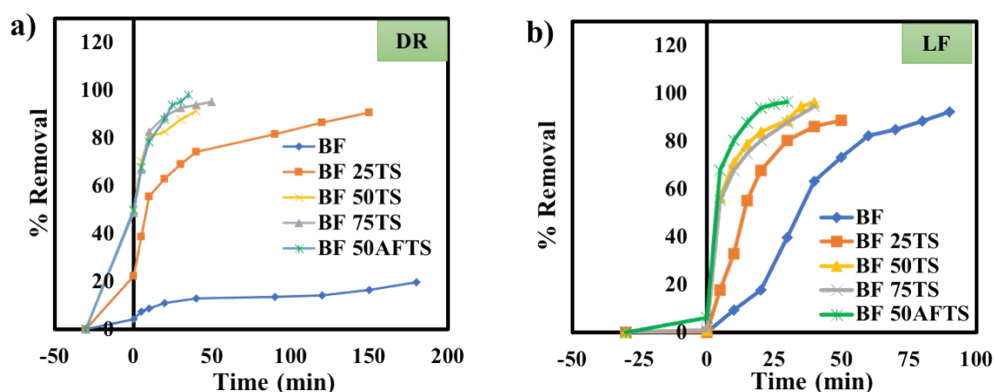

290

291 **Fig. S9** Time dependent % removal plots showing the photocatalytic degradation of (a) DR  
 292 and (b) LF using BF and p-n/n homo-heterojunctions.

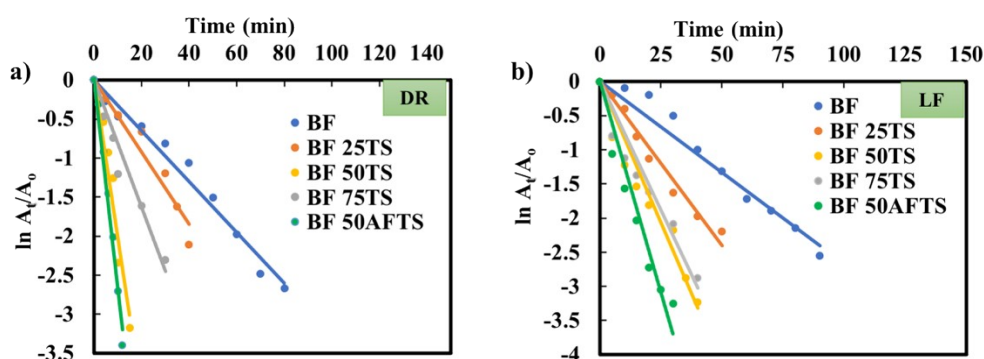

293

294 **Fig. S10** Pseudo first order kinetic curves for the photocatalytic degradation of DR and LF  
 295 using BF and p-n/n homo-heterojunction.

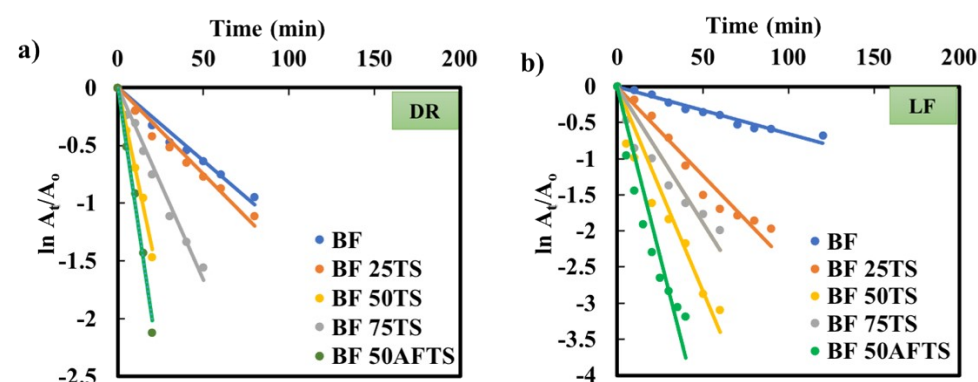

296

297 **Fig. S11** Pseudo first order kinetic curves for the catalytic degradation (without light  
 298 irradiation) of DR and LF using BF and p-n/n homo-heterojunctions.

299 **Table S3** Percentage degradation, completion time and their corresponding rate constant values  
 300 for the degradation of DR, LF drugs using BF and its p-n/n homo-heterojunction (with light  
 301 (L) and without light (W.L)).



| Catalyst         | DR (W.L)                                    |                                   | LF (W.L)                                    |                                     |
|------------------|---------------------------------------------|-----------------------------------|---------------------------------------------|-------------------------------------|
|                  | $k \cdot 10^{-2} \text{ (min}^{-1}\text{)}$ | Removal time (min)<br>(removal %) | $k \cdot 10^{-2} \text{ (min}^{-1}\text{)}$ | Removal<br>time (min)<br>(removal%) |
| BF               | 1.2                                         | 80(62.3)                          | 0.6                                         | 120(49.7)                           |
| BF 25TS          | 1.5                                         | 80(70.2)                          | 2.4                                         | 90(88.8)                            |
| BF 50TS          | 6.9                                         | 20(91.8)                          | 5.6                                         | 60(95.5)                            |
| BF 75TS          | 3.3                                         | 50(89.1)                          | 3.7                                         | 60(86.5)                            |
| <b>BF 50AFTS</b> | <b>10.0</b>                                 | <b>20(95.9)</b>                   | <b>9.3</b>                                  | <b>40(96.0)</b>                     |

  

| Catalyst         | DR (L)      |                 | LF (L)      |                 |
|------------------|-------------|-----------------|-------------|-----------------|
| BF               | 3.2         | 80(93.2)        | 2.6         | 90(92.1)        |
| BF 25TS          | 4.6         | 40(89.2)        | 4.8         | 50(86.6)        |
| BF 50TS          | 20.0        | 15(99.6)        | 8.2         | 40(96.0)        |
| BF 75TS          | 8.1         | 30(94.55)       | 7.5         | 40(94.4)        |
| <b>BF 50AFTS</b> | <b>26.6</b> | <b>12(98.6)</b> | <b>12.2</b> | <b>30(96.3)</b> |

302

303 **Table S4.** Comparison of specific photocatalytic efficiency of BF and modified BF for  
304 degradation of DR and LF.

| Specific catalytic efficiency for degradation |                                                     |                                                  |                      |
|-----------------------------------------------|-----------------------------------------------------|--------------------------------------------------|----------------------|
| Photocatalyst                                 | $S_{\text{BET}} \text{ (m}^2\text{/g}^{-1}\text{)}$ | $k/S_{\text{BET}} \text{ (g m}^{-2}\text{/min)}$ |                      |
|                                               |                                                     | DR                                               | LF                   |
| BF                                            | 4.32                                                | $0.74 \cdot 10^{-2}$                             | $0.60 \cdot 10^{-2}$ |
| BF 25TS                                       | 27.42                                               | $0.16 \cdot 10^{-2}$                             | $0.17 \cdot 10^{-2}$ |

|           |       |                       |                       |
|-----------|-------|-----------------------|-----------------------|
| BF 50TS   | 43.40 | $0.46 \times 10^{-2}$ | $0.18 \times 10^{-2}$ |
| BF 75TS   | 58.90 | $0.13 \times 10^{-2}$ | $0.12 \times 10^{-2}$ |
| BF 50AFTS | 99.0  | $0.26 \times 10^{-2}$ | $0.12 \times 10^{-2}$ |

305

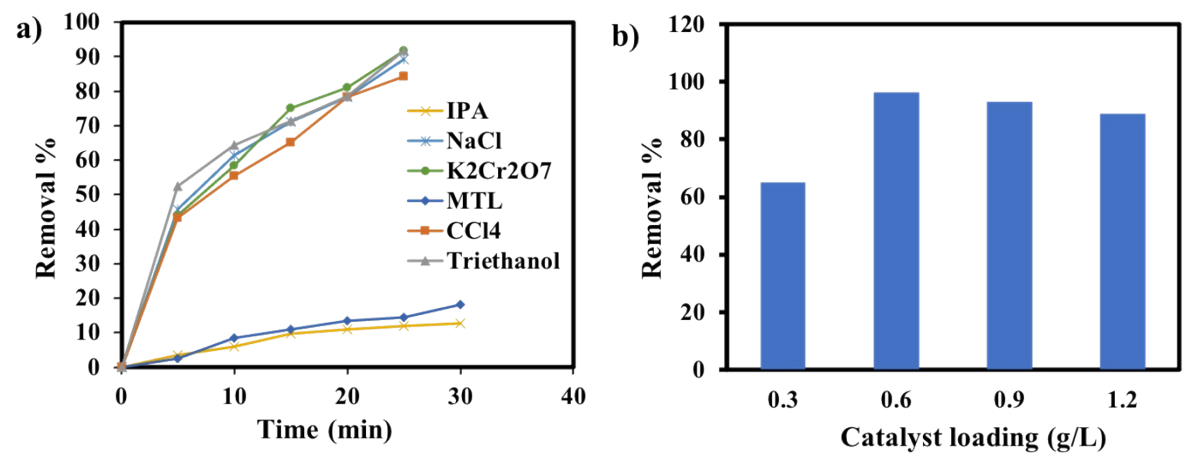

306

307 **Fig. S12** (a) Radical scavenging studies of LF using BF AF50TS as catalyst, (b) % Removal  
308 plots revealing the optimized catalyst loading.

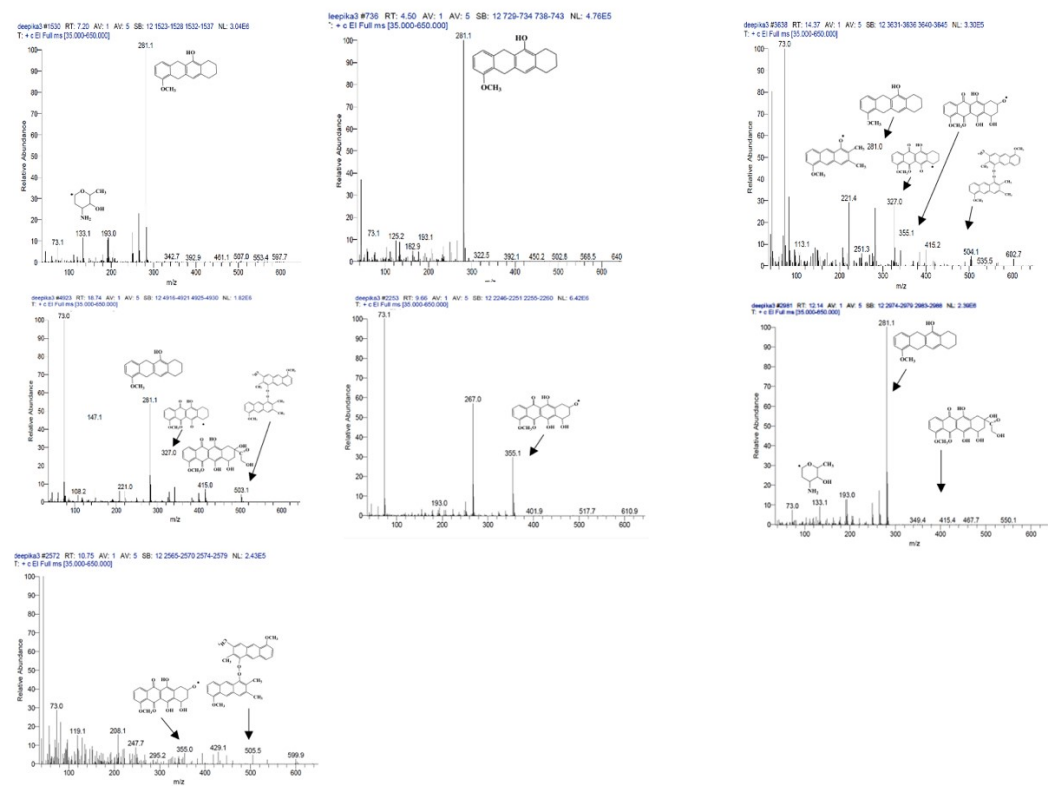

309

310 **Fig. S13** GC-MS fragment analysis chart for DR degradation intermediates in presence of light  
311 only.

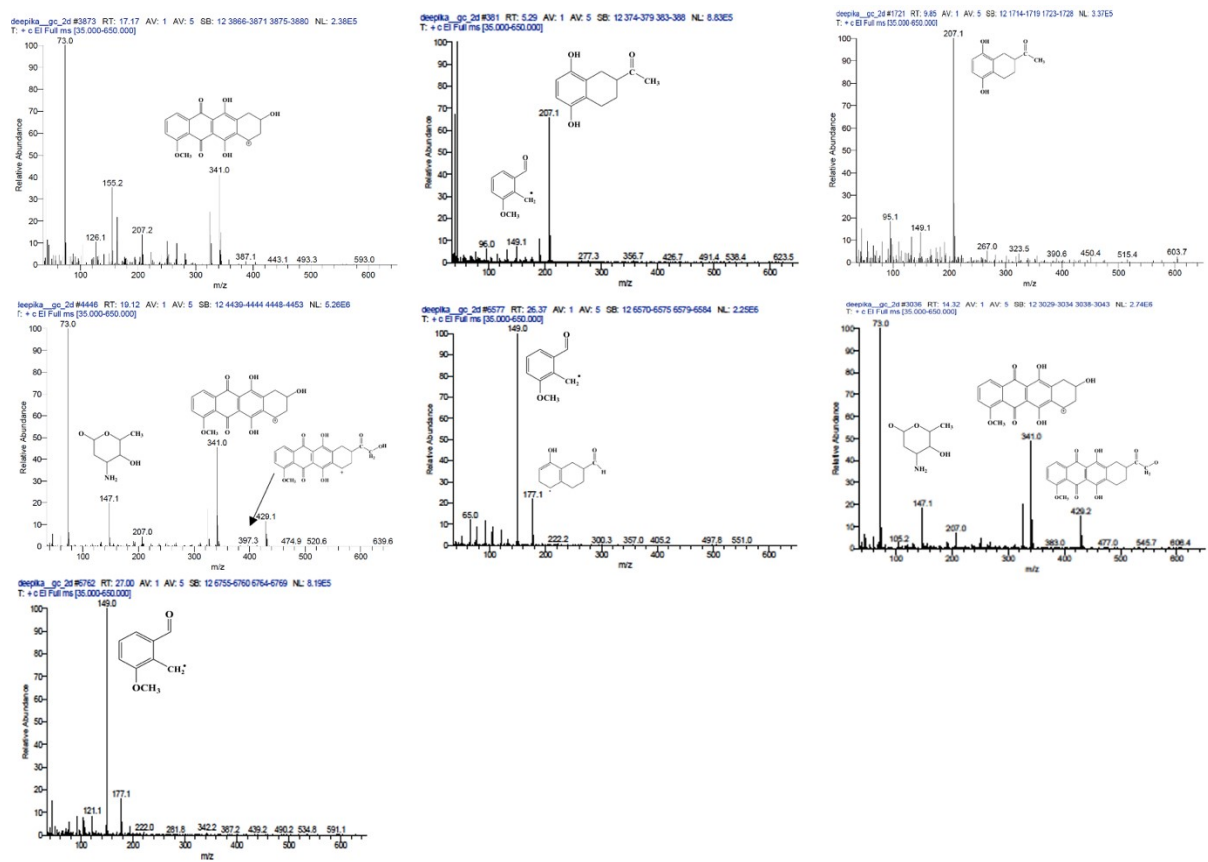

313 **Fig. S14** GC-MS fragment analysis chart for DR degradation intermediates in presence of  
314 oxidant, BF 50AFTS and light.

315 Table S5 Possible intermediates of DR during degradation in presence of light only

| DR After 7 h in light only | m/z | Structure                                                                               |
|----------------------------|-----|-----------------------------------------------------------------------------------------|
| DR                         | 545 | <chem>COc1ccc2c(c1)c3c(O)c(O)c(O)c(O)c3O[C@@H]4[C@H](O)[C@@H](CO)[C@H](O)[C@H]4O</chem> |
| A1                         | 414 | <chem>COc1ccc2c(c1)c3c(O)c(O)c(O)c(O)c3O[C@@H]4[C@H](O)[C@H](O)[C@H](O)[C@H]4O</chem>   |

|    |     |                                                                                    |
|----|-----|------------------------------------------------------------------------------------|
| A2 | 355 | 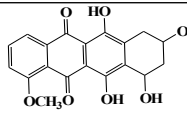 |
| A3 | 327 |  |
| A4 | 280 |  |
| A5 | 221 |  |
| A6 | 502 |  |

316

317 **Table S6** Possible intermediates of DR during photocatalytic degradation (in presence of light,  
318 H<sub>2</sub>O<sub>2</sub> and BF 50AFTS at pH 2.5)

| DR after<br>15 min | m/z | Structure                                                                            |
|--------------------|-----|--------------------------------------------------------------------------------------|
| DR                 | 545 | 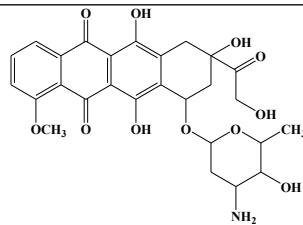 |
| B1                 | 397 |  |
| B3                 | 383 |  |

|    |     |                                                                                     |
|----|-----|-------------------------------------------------------------------------------------|
| B4 | 341 | 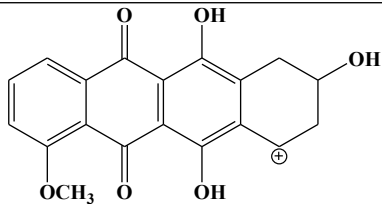  |
| B6 | 207 |   |
| B2 | 147 |    |
|    | 73  | $4 \text{ H}_2\text{O} + \text{H}^+$                                                |
| B8 | 177 |   |
| B7 | 149 |  |
|    | 65  | $2 \text{ H}_2\text{O} + \text{CO} + \text{H}^+$                                    |

319

320 **Table S7** Toxicity assessment (using ECOSAR) of intermediates recorded during degradation  
 321 of DR under different conditions.

| DR After 7 h in<br>light only | Fish<br>Toxicity (mg/L)<br>LC <sub>50</sub> (96 h) | DR after 15 min<br>(catalyst + oxidant) | Fish<br>Toxicity (mg/L)<br>LC <sub>50</sub> (96 h) |
|-------------------------------|----------------------------------------------------|-----------------------------------------|----------------------------------------------------|
| DR                            | 0.54                                               | DR                                      | 0.54                                               |
| A1                            | 7.500                                              | B3                                      | 1050                                               |
| A2                            | 0.200                                              | B4                                      | 781                                                |
| A3                            | 0.040                                              | B6                                      | 13.5                                               |

|    |          |    |      |
|----|----------|----|------|
| A4 | 0.087    | B2 | 9480 |
| A5 | 0.386    | B8 | 11.1 |
| A6 | 0.000034 | B7 | 61.3 |

\*Green highlights the reduction in toxicity as that of DR, whereas, Red highlights enhancement in toxicity.

**Table S8** MRI, GP% and calculated SVI values of *Vigna radiata* seed germination in contaminated river water (before and after phototreatment)

| Pollutants added in river water                           | MRE (cm) before phototreatment/ after phototreatment | GP% before phototreatment/after Phototreatment       | SVI before phototreatment/after phototreatment |
|-----------------------------------------------------------|------------------------------------------------------|------------------------------------------------------|------------------------------------------------|
| DR                                                        | 0.3/1.8                                              | 30/75                                                | 9/135                                          |
| LF                                                        | 1.8/2.2                                              | 70/90                                                | 126/198                                        |
| <b>For Controlled River water</b>                         |                                                      |                                                      |                                                |
| MRE (cm) in absence of BF 50AFTS/in presence of BF 50AFTS | GP% in absence of BF 50AFTS/in presence of BF 50AFTS | SVI in absence of BF 50AFTS/in presence of BF 50AFTS |                                                |
| 2.5/2.8                                                   | 95/95                                                | 237/266                                              |                                                |

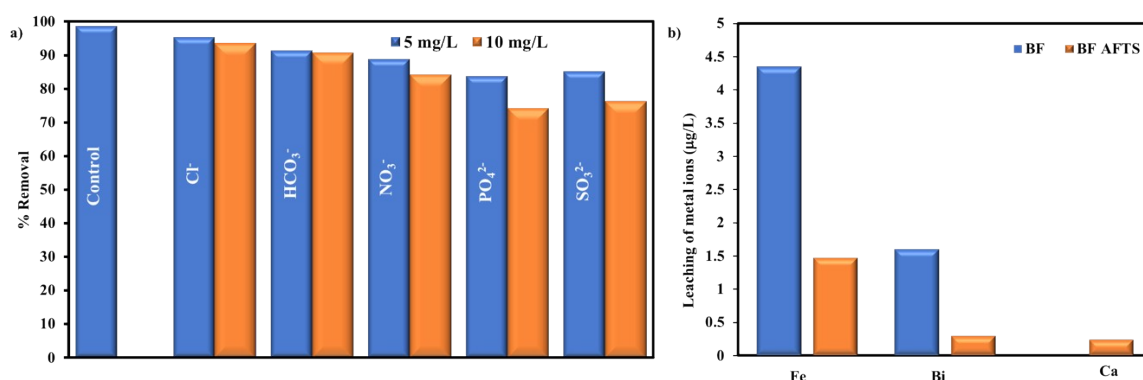

**Fig. 15** (a) Interference of possible anions on %removal of DR (b) leaching of metal ions during degradation of DR utilizing BF and BF 50AFTS (catalyst amount used 0.60 g/L and pH = 2.5)

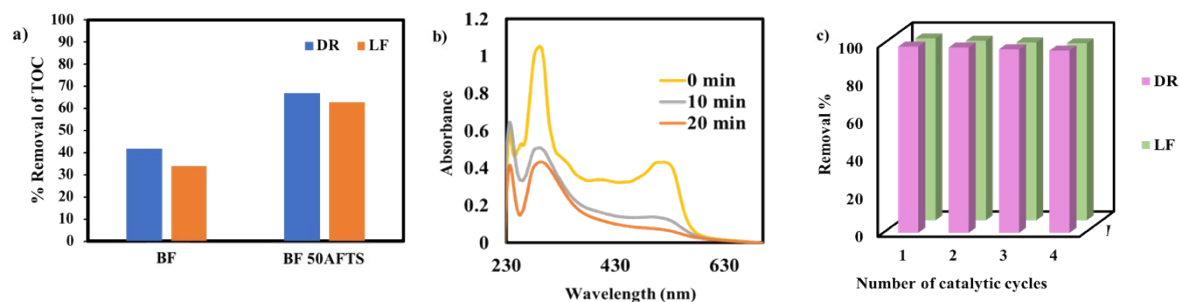

330

331 **Fig. S16** (a) % Removal of TOC using BF and BF 50AFTS, (b) Time-dependent UV–visible  
 332 spectra for degradation of mixture of SO, RB-Y, DR and LF using BF 50AFTS p-n/n homo-  
 333 heterojunction , (c) Recyclability studies of BF 50AFTS.

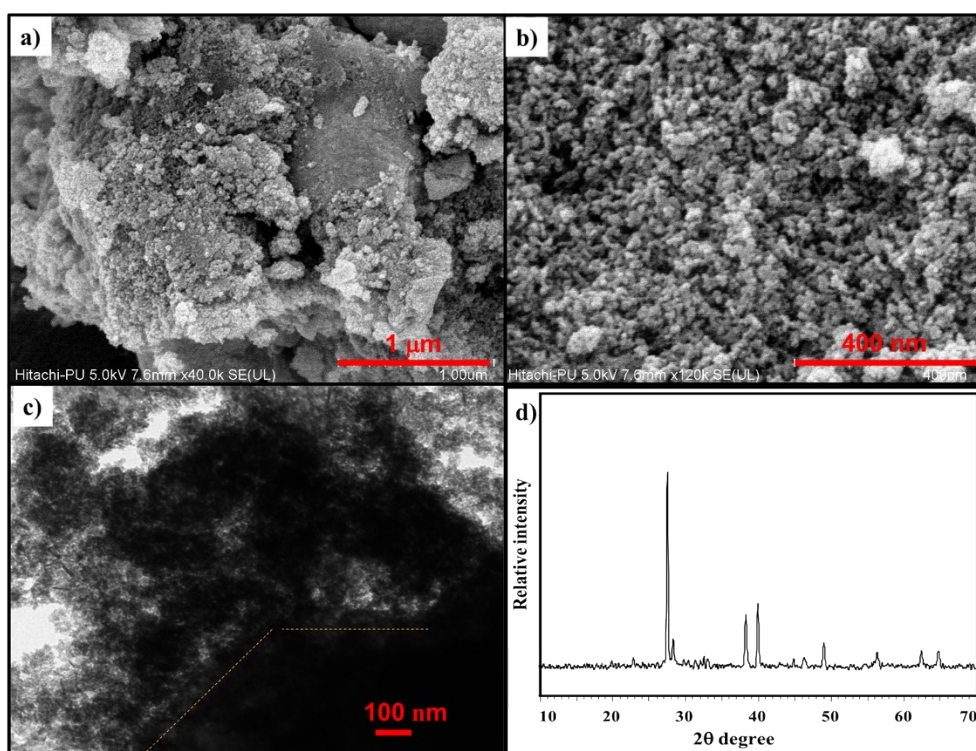

334

335 **Fig. S17** (a, b) FE-SEM image of recovered BF 50AFTS at 1 μm and 400 nm, (c) TEM image  
 336 of recovered BF 50AFTS at 100 nm and (d) PXRD pattern of recovered BF 50AFTS.

### 337 Electrochemical Optimization Parameters

338 To investigate the effect one parameter was varied at a time keeping others constant.  
 339 The GCE was cleaned properly using  $\alpha$ -alumina powder. A uniform dispersion of best catalyst  
 340 (BF 50AFTS, 5 mg/mL) was prepared in aqueous medium, 4  $\mu$ L suspension was robbed to  
 341 drop cast on pre-washed GCE and allowed to dry naturally.

### 342 Effect of pH

343 The pH of supporting electrolyte plays a vital role in the process of electrochemical  
344 detection, in order to attain the optimum pH, experiments at varying pH values were performed  
345 keeping accumulation potential and accumulation time constant (17.27  $\mu$ M of DR drug in 0.1  
346 M acetate buffer, +0.4 V accumulation potential and 80 s accumulation time). NaOH/HCl was  
347 added to the supporting electrolyte to adjust pH in range of 3-8 . It was observed that with  
348 increase in pH from pH 3 to 5, current response for DR elevated significantly as shown in Fig.  
349 S18 (a). With further increase in pH values noticeable loss in current response was evidenced,  
350 which may be due to the electrostatic repulsion between positively charged surface of DR and  
351 positively charged modified electrode (BF 50AFTS@GCE).<sup>12</sup> Thus, further electrochemical  
352 experiments were performed with supporting electrolyte having optimal pH 5.

### 353 **Effect of accumulation potential and accumulation time**

354 In order to perceive best current response and to ensure maximum accumulation of  
355 analyte over electrode surface, optimization studies of accumulation potential were performed  
356 via analyzing the current response in potential range +0.2 V to +0.7 V (17.27  $\mu$ M of DR drug  
357 in 0.1 M acetate buffer at pH= 5, 80 s accumulation time). Initially, the oxidation peak current  
358 was found to increase with increase in accumulation potential and maximum current response  
359 was observed at +0.4 V, further increase in accumulation potential resulted in declination of  
360 current response (Fig. S18 (b). Since, accumulation potential should be more negative to ensure  
361 the maximum deposition through reduction of the targeted analyte, hence, +0.4 V accumulation  
362 potential was chosen for further experimental studies.

363 Accumulation time is the specific time interval given to the ions (ions of DR present in  
364 electrolyte) to deposit on the surface of GCE at optimum accumulation potential. The square  
365 wave experiments were performed with varying accumulation time from 20 to 140 s (at pH=  
366 5, Potential range +0.2 V to +0.7 V ) and was observed that with elevation in accumulation  
367 time, current response for DR drug increased and get saturated at 80 s (Fig. S18 (c)). The  
368 saturation of current could be attributed to the formation of multilayer and saturation of  
369 electrode surface with reduced DR ions. Hence, +0.4 V accumulation potential for 80 s was  
370 chosen for further investigations of DR sensing.<sup>13</sup>



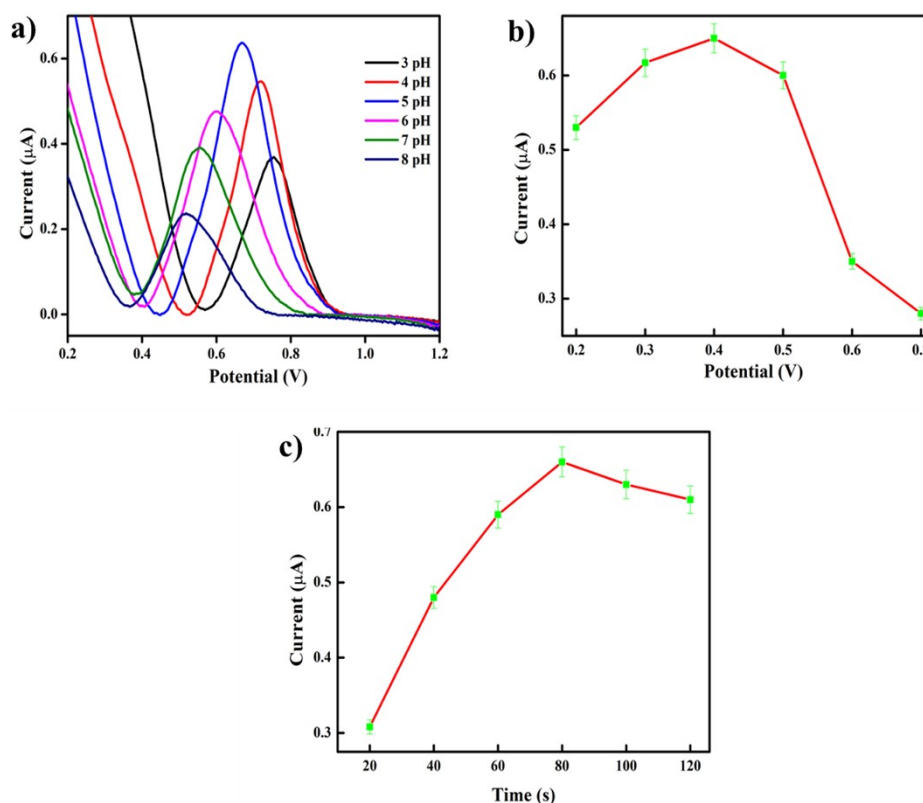

371

372 **Fig. S18** SWASV response of BF 50AFTS@GCE for DR (a) at different pH in acetate buffer  
 373 (b) with varying accumulation potential (c) for different accumulation times.

#### 374 Interference, Repeatability and Reproducibility studies

375 Presence of other active species in real samples can interfere in the detection process  
 376 and may mislead the analytical results. Thus, in order to investigate the anti-interference  
 377 property of designed sensor, various interfering ions (drugs, uric acid, ascorbic acid, dopamine,  
 378 glucose and aminophenols) were added to the electrolyte solution along with DR drug (17.27  
 379 μM of DR drug) under optimized conditions and the results are showcased in Fig. S19. Despite  
 380 the introduction of high concentration (100 fold in comparison of analyte concentration) of  
 381 interfering ions no significant effect on the obtained current response was observed, which  
 382 clearly predicts that, co-existence of other active species in medium failed to alter the sensing  
 383 ability of the designed sensor towards DR drug. The value of relative standard deviation (RSD)  
 384 was found to be 2.60 %, thereby, results affirms the robustness of the design sensor which can  
 385 easily detect the DR drug even in the presence of high concentration of interfering ions in the  
 386 solution.

387 The designed sensor was testified upto 4 repetitive cycles of square wave voltammetric  
 388 analysis for sensing of DR drug under optimized reaction conditions, no significant change in

389 current response was witnessed (Fig. S20 (a)). 0.62 % relative standard deviation was observed,  
 390 whereas, 99% current was found to be retained even after 4 cycles. After repeatability,  
 391 reproducibility experiments were performed by preparing 5 independent assembly of BF  
 392 50AFTS@GCE (under optimized conditions), the obtained results bespeaks 1.54 % RSD for 5  
 393 freshly modified electrodes (Fig. S20 (b)). Thus proffer sensor could be employed for long  
 394 term prospective implementation.

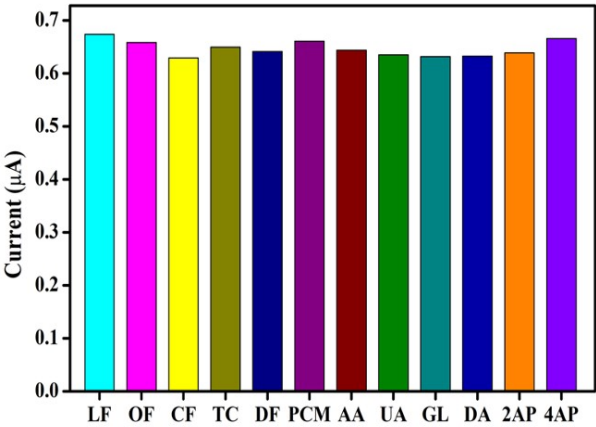

395

396 **Fig. S19** Interference studies for various drugs (levofloxacin (LF), ofloxacin (OF),  
 397 ciprofloxacin (CF), tetracycline (TC), diclofenac (DF), paracetamol (PCM)), ascorbic acid  
 398 (AA), uric acid (UA), glucose (GL), dopamine (DA) and nitro phenols (2-aminophenol (2AP)  
 399 and 4-aminophenol (2AP)) on detection of 17.27  $\mu\text{M}$  of DR in 0.1 M acetate buffer (pH = 5.0)  
 400

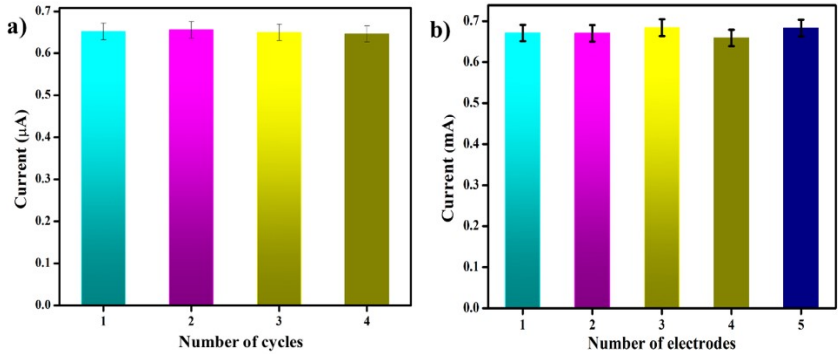

401

402 **Fig. S20** (a) Current response obtained for 17.27  $\mu\text{M}$  DR drug obtained from repeatability  
 403 analysis of BF 50AFTS@GCE and (b) Reproducibility analysis of BF 50AFTS@GCE with  
 404 17.27  $\mu\text{M}$  DR under optimized parameters.

#### 405 Literature Comparison

406 **Table S9** Comparison of present work with recently published Bi<sub>2</sub>Fe<sub>4</sub>O<sub>9</sub> based literature  
407 reports.

| S.No | Material used                                                        | Application                                                                                     | Amount removed (time)                  | Phytotoxicity assessment | Exploration of by-Products/Use of light required | Mixture /industrial sample/ biowaste utilization | Year (Reference )  |
|------|----------------------------------------------------------------------|-------------------------------------------------------------------------------------------------|----------------------------------------|--------------------------|--------------------------------------------------|--------------------------------------------------|--------------------|
| 1    | BiFeO <sub>3</sub> /Bi <sub>2</sub> Fe <sub>4</sub> O <sub>9</sub>   | Methylene blue degradation                                                                      | 83% in 3 h                             | -                        | No/Yes                                           | No/No/No                                         | 2022 <sup>14</sup> |
| 2    | Bi <sub>2</sub> Fe <sub>4</sub> O <sub>9</sub>                       | Bisphenol degradation                                                                           | 98.3% in 30 min                        | -                        | Yes/Yes                                          | No/Yes/No                                        | 2022 <sup>15</sup> |
| 3    | BiFeO <sub>3</sub> /Bi <sub>2</sub> Fe <sub>4</sub> O <sub>9</sub>   | Methyl orange, Methylene blue, Rhodamine B, methyl red, acid red and Congo red dyes degradation | 92, 82, 75, 70, 62, and 98% in 120 min | -                        | No/Yes                                           | Yes/No/No                                        | 2021 <sup>16</sup> |
| 4    | Bi <sub>2</sub> (1-x)Gd <sub>2</sub> xFe <sub>4</sub> O <sub>9</sub> | Methylene blue dye degradation                                                                  | 77% in 80 min                          | -                        | No/Yes                                           | No                                               | 2021 <sup>17</sup> |
| 5    | Bi <sub>2</sub> Fe <sub>4</sub> O <sub>9</sub>                       | Tartrazine yellow dye degradation                                                               | 99.34% in 120 min                      | -                        | No/Yes                                           | No                                               | 2020 <sup>18</sup> |
| 6    | Bi <sub>2</sub> Fe <sub>4</sub> O <sub>9</sub> /PMS                  | Sulfamethoxazole degradation                                                                    | >95% in 30 min                         | -                        | Yes/Yes                                          | No/Yes/No                                        | 2019 <sup>19</sup> |
| 7    | g-C <sub>3</sub> N <sub>4</sub> /RG O/BFO                            | Congo Red dye degradation                                                                       | 86.7% in 60 min                        | -                        | No/Yes                                           | No                                               | 2020 <sup>20</sup> |
| 8    | g-C <sub>3</sub> N <sub>4</sub> /CNT /BFO                            | acid orange 7 degradation                                                                       | 85% in 4 h                             | -                        | No/Yes                                           | No                                               | 2018 <sup>21</sup> |

|    |                                                                                             |                                                                                      |                                                                                                            |     |         |             |                    |
|----|---------------------------------------------------------------------------------------------|--------------------------------------------------------------------------------------|------------------------------------------------------------------------------------------------------------|-----|---------|-------------|--------------------|
| 9  | BiFeO <sub>3</sub> /Bi<br>2Fe <sub>4</sub> O <sub>9</sub> /H <sub>2</sub><br>O <sub>2</sub> | Sulfamethoxazole<br>degradation                                                      | 95% in<br>270 min                                                                                          | -   | Yes/Yes | Yes/No/No   | 2020 <sup>22</sup> |
| 10 | BFO <sub>249</sub> /rG<br>O <sub>4.5</sub>                                                  | bisphenol A<br>degradation                                                           | 80% in 3 h                                                                                                 | -   | No/Yes  | No          | 2015 <sup>23</sup> |
| 11 | BF AFTS                                                                                     | DR, LF drugs<br>oxidative<br>degradation;<br>Electrochemical<br>detection of DR drug | 98.6% (in<br>12 min)<br>and<br>96.3% (in<br>30 min);<br>Limit of<br>detection<br>of DR<br>(LOD)<br>1.99 nM | Yes | Yes/No  | Yes/Yes/Yes | Present<br>work    |

408

409

#### 410 References

- 411 [1] Mushtaq F, Chen X, Hoop M, Torlakcik H, Pellicer E, Sort J, Gattinoni C, Nelson BJ, Pané  
412 S. Piezoelectrically enhanced photocatalysis with BiFeO<sub>3</sub> nanostructures for efficient  
413 water remediation. I science. 2018 Jun 29;4:236-46.
- 414 [2] Komal, Gupta K, Kaur S, Kaur J, Kaushik A, Singhal S. A comparative analysis of source  
415 based distinctly functionalized nanostructured cellulose for the adsorptive removal of toxic  
416 colorants. Cellulose. 2019 Feb 15;26:1703-24.
- 417 [3] Kaur P, Singh S, Kumar V, Tikoo KB, Kaushik A, Singhal S. Development of emphatic  
418 catalysts for waste water remediation via synchronized free radical and non-free radical  
419 routes with composites of strontium hexaferrite, graphene and multi-walled carbon  
420 nanotubes. Ceramics International. 2022 Feb 15;48(4):4795-811.
- 421 [4] Mathew SS, Sunny NE, Shanmugam V. Green synthesis of anatase titanium dioxide  
422 nanoparticles using Cuminum cyminum seed extract; effect on Mung bean (Vigna radiata)  
423 seed germination. Inorganic Chemistry Communications. 2021 Apr 1;126:108485.

- 424 [5] Murshed MM, Nénert G, Burianek M, Robben L, Mühlberg M, Schneider H, Fischer RX,  
 425 Gesing TM. Temperature-dependent structural studies of mullite-type  $\text{Bi}_2\text{Fe}_4\text{O}_9$ . *Journal of*  
 426 *Solid State Chemistry*. 2013 Jan 1;197:370-8.
- 427 [6] Ashok B, Hariram N, Siengchin S, Rajulu AV. Modification of tamarind fruit shell powder  
 428 with in situ generated copper nanoparticles by single step hydrothermal method. *Journal of*  
 429 *Bioresources and Bioproducts*. 2020 Aug 1;5(3):180-5.
- 430 [7] Maheswari CU, Reddy KO, Muzenda E, Shukla M, Rajulu AV. Mechanical properties and  
 431 chemical resistance of short tamarind fiber/unsaturated polyester composites: Influence of  
 432 fiber modification and fiber content. *International Journal of Polymer Analysis and*  
 433 *Characterization*. 2013 Oct 3;18(7):520-33.
- 434 [8] Sun H, Liu Y, Zhang Y, Lv L, Zhou J, Chen W. Synthesis of  $\text{Bi}_2\text{Fe}_4\text{O}_9$ /reduced graphene  
 435 oxide composite by one-step hydrothermal method and its high photocatalytic performance.  
 436 *Journal of Materials Science: Materials in Electronics*. 2014 Oct;25:4212-8.
- 437 [9] Liu P, Sun H, Liu X, Sui H, Zhang Y, Zhou D, Guo Q, Ruan Y. Enhanced photocatalytic  
 438 performance of  $\text{Bi}_2\text{Fe}_4\text{O}_9$ /graphene via modifying graphene composite. *Journal of the*  
 439 *American Ceramic Society*. 2017 Aug;100(8):3540-9.
- 440 [10] Wang X, Fan J, Qian F, Min Y. Magnetic  $\text{BiFeO}_3$  grafted with MWCNT hybrids as  
 441 advanced photocatalysts for removing organic contamination with a high concentration.  
 442 *RSC advances*. 2016;6(55):49966-72.
- 443 [11] Gupta K, Kumar V, Tikoo KB, Kaushik A, Singhal S. Encrustation of cadmium sulfide  
 444 nanoparticles into the matrix of biomass derived silanized cellulose nanofibers for  
 445 adsorptive detoxification of pesticide and textile waste. *Chemical Engineering Journal*. 2020  
 446 Apr 1;385:123700.
- 447 [12] Dumitru R, Ianculescu A, Păcurariu C, Lupa L, Pop A, Vasile B, Surdu A, Manea F.  
 448  $\text{BiFeO}_3$ -synthesis, characterization and its photocatalytic activity towards doxorubicin  
 449 degradation from water. *Ceramics international*. 2019 Feb 1;45(2):2789-802.
- 450 [13] Datir SR, Das M, Singh RP, Jain S. Hyaluronate tethered, “smart” multiwalled carbon  
 451 nanotubes for tumor-targeted delivery of doxorubicin. *Bioconjugate chemistry*. 2012 Nov  
 452 21;23(11):2201-13.
- 453 [14] Taazayet WB, Zouari IM, Hosni N, Dkhil B, Mliki NT. Facile synthesis of pure  $\text{BiFeO}_3$   
 454 and  $\text{Bi}_2\text{Fe}_4\text{O}_9$  nanostructures with enhanced photocatalytic activity. *Journal of Materials*  
 455 *Science: Materials in Electronics*. 2021:1-6.

- 456 [15] Su C, Li R, Li C, Wang W. Piezo-promoted regeneration of  $\text{Fe}^{2+}$  boosts peroxydisulfate  
457 activation by  $\text{Bi}_2\text{Fe}_4\text{O}_9$  nanosheets. *Applied Catalysis B: Environmental*. 2022 Aug  
458 5;310:121330.
- 459 [16] Tian L, Gao PA, Wang FG, Li XW, Li G. Study on Preparation of  $\text{BiFeO}_3/$   
460  $\text{Bi}_2\text{Fe}_4\text{O}_9$  Composite Photocatalyst and Photocatalytic Degradation of Various Organic Dyes  
461 in Waste Water. *Russian Journal of Physical Chemistry A*. 2021 Jul;95:1495-504.
- 462 [17] Rao KS, Kamath SM, Kumar RR, Kavitha G, MeherAbhinav E, Shri SS, Induja S,  
463 Gopalakrishnan C. Delineating the photocatalytic properties of doped mullite  $\text{Bi}_2\text{Fe}_4\text{O}_9$  by  
464 virtue of  $\text{Gd}^{3+}$  ions. *Materials Letters*. 2021 Aug 15;297:129960.
- 465 [18] Casanova Monteiro F, Caetano EH, de Jesus Cubas P, Pupin AV, Monteiro JF, Fujiwara  
466 ST.  $\text{Bi}_2\text{Fe}_4\text{O}_9$  in pellet form is an alternative in the wastewater treatment process. *Journal of*  
467 *Environmental Science and Health, Part A*. 2020 May 11;55(6):677-85.
- 468 [19] Oh WD, Chang VW, Lim TT. A comprehensive performance evaluation of heterogeneous  
469  $\text{Bi}_2\text{Fe}_4\text{O}_9$ /peroxymonosulfate system for sulfamethoxazole degradation. *Environmental*  
470 *Science and Pollution Research*. 2019 Jan 21;26:1026-35.
- 471 [20] Shekardasht MB, Givianrad MH, Gharbani P, Mirjafary Z, Mehrizad A. Preparation of a  
472 novel Z-scheme  $\text{g-C}_3\text{N}_4/\text{RGO}/\text{Bi}_2\text{Fe}_4\text{O}_9$  nanophotocatalyst for degradation of Congo Red  
473 dye under visible light. *Diamond and Related Materials*. 2020 Nov 1;109:108008.
- 474 [21] Di L, Yang H, Xian T, Chen X. Construction of Z-scheme  $\text{g-C}_3\text{N}_4/\text{CNT}/$   
475  $\text{Bi}_2\text{Fe}_4\text{O}_9$  composites with improved simulated-sunlight photocatalytic activity for the dye  
476 degradation. *Micromachines*. 2018 Nov 22;9(12):613.
- 477 [22] Hu ZT, Liu JW, Zhao J, Ding Y, Jin Z, Chen J, Dai Q, Pan B, Chen Z, Chen J. Enhanced  
478  $\text{BiFeO}_3/\text{Bi}_2\text{Fe}_4\text{O}_9/\text{H}_2\text{O}_2$  heterogeneous system for sulfamethoxazole decontamination:  
479 System optimization and degradation pathways. *Journal of Colloid and Interface Science*.  
480 2020 Oct 1;577:54-65.
- 481 [23] Hu ZT, Liu J, Yan X, Oh WD, Lim TT. Low-temperature synthesis of graphene/ $\text{Bi}_2\text{Fe}_4\text{O}_9$   
482 composite for synergistic adsorption-photocatalytic degradation of hydrophobic pollutant  
483 under solar irradiation. *Chemical Engineering Journal*. 2015 Feb 15;262:1022-32.
